Development 138, 5099–5112 (2011) doi:10.1242/dev.065995  
 © 2011. Published by The Company of Biologists Ltd

# FGF/EGF signaling regulates the renewal of early nephron progenitors during embryonic development

Aaron C. Brown<sup>1</sup>, Derek Adams<sup>1</sup>, Mark de Caestecker<sup>2</sup>, Xuehui Yang<sup>1</sup>, Robert Friesel<sup>1</sup> and Leif Oxburgh<sup>1,\*</sup>

## SUMMARY

Recent studies indicate that nephron progenitor cells of the embryonic kidney are arranged in a series of compartments of an increasing state of differentiation. The earliest progenitor compartment, distinguished by expression of CITED1, possesses greater capacity for renewal and differentiation than later compartments. Signaling events governing progression of nephron progenitor cells through stages of increasing differentiation are poorly understood, and their elucidation will provide key insights into normal and dysregulated nephrogenesis, as well as into regenerative processes that follow kidney injury. In this study, we found that the mouse CITED1<sup>+</sup> progenitor compartment is maintained in response to receptor tyrosine kinase (RTK) ligands that activate both FGF and EGF receptors. This RTK signaling function is dependent on RAS and PI3K signaling but not ERK. In vivo, RAS inactivation by expression of sprouty 1 (*Spry1*) in CITED1<sup>+</sup> nephron progenitors results in loss of characteristic molecular marker expression and in increased death of progenitor cells. Lineage tracing shows that surviving *Spry1*-expressing progenitor cells are impaired in their subsequent epithelial differentiation, infrequently contributing to epithelial structures. These findings demonstrate that the survival and developmental potential of cells in the earliest embryonic nephron progenitor cell compartment are dependent on FGF/EGF signaling through RAS.

**KEY WORDS:** Nephrogenic mesenchyme, Cap mesenchyme, GUDMAP, Sprouty, EGF, FGF, TGF $\alpha$ , Mouse

## INTRODUCTION

Nephrogenesis serves as an important model system for the study of mesenchymal-epithelial interactions in development. Both organ culture and gene inactivation studies have provided a detailed understanding of many interactions between the nephrogenic mesenchyme and ureteric bud that underlie the development of the fully formed organ (Grobstein, 1953; Grobstein and Dalton, 1957; Vainio and Lin, 2002). These investigations have recently been complemented with high-resolution mapping of gene expression and demonstrate that the population of nephron progenitor cells capping the ureteric bud (the 'cap mesenchyme') can be divided into a series of subcompartments based on the expression of distinct transcriptional regulators (Boyle et al., 2008; Brunskill et al., 2008; Kobayashi et al., 2008; Mugford et al., 2009). Expression of the transcriptional co-factor CITED1 characterizes early nephron progenitors, whereas loss of CITED1 and gain of the LEF1 transcription factor define the pretubular aggregate compartment that precedes epithelialization of the nascent nephron during differentiation. The functional significance of division of the cap mesenchyme into discrete progenitor cell compartments is at present not fully understood. One possibility is that early CITED1<sup>+</sup> progenitors are resistant to the inductive activities of Wnt signaling because they do not express the Wnt transcription factor LEF1. Insulation from inductive signals would ensure the maintenance of a progenitor cell pool for continued rounds of

nephron differentiation. Compartmentalization, which is a feature of numerous progenitor cell niches in the adult, prevents premature exhaustion of the highest order progenitors, and it is an intriguing possibility that progenitor cell organization in the developing kidney might fit this paradigm (Greco and Guo, 2010).

Previous investigations identified a number of genes required for nephron progenitor cell maintenance. Within nephrogenic mesenchyme, expression of the *Wt1* transcription factor is essential for mesenchyme survival, whereas *Six2* is crucial for self-renewal and is required to suppress the premature differentiation of nephron progenitor cells (Kobayashi et al., 2008; Kreidberg et al., 1993; Self et al., 2006). *Eya1*, which lies upstream of *Six2*, is necessary for induction of the mesenchyme (Kiefer et al., 2010; Nishinakamura et al., 2001; Xu et al., 1999). Genetic inactivation of *Bmp7*, which is expressed both in cap mesenchyme and ureteric bud tissue, results in reduced proliferation and premature depletion of nephron progenitor cells (Blank et al., 2009; Dudley et al., 1995; Luo et al., 1995). Inactivation of FGF receptors 1 and 2 in nephrogenic mesenchyme completely abrogates its growth, suggesting an essential role for FGF signaling (Poladia et al., 2006). FGF2 is secreted from the ureteric bud and recombinant FGF2 maintains nephrogenic mesenchyme in culture, making it an attractive candidate signal for progenitor cell maintenance in vivo (Plisov et al., 2001). However, the lack of a kidney development phenotype in the *Fgf2* null mouse argues that a group of redundant ligands might be responsible for progenitor maintenance (Dono et al., 1998; Ortega et al., 1998).

Although genetic and biochemical studies have revealed essential functions for specific genes and pathways in maintenance of the cap mesenchyme as a whole, we have yet to define the pathways required for the maintenance of specific progenitor subcompartments. In this study, we utilize a recently established system for the culture of primary cells derived from the mouse embryonic kidney to screen for growth factors that promote maintenance of the early CITED1<sup>+</sup> nephron progenitor cell

<sup>1</sup>Center for Molecular Medicine, Maine Medical Center Research Institute, 81 Research Drive, Scarborough, ME 04074, USA. <sup>2</sup>Department of Cell and Developmental Biology, Vanderbilt University Medical Center, Nashville, TN 37232, USA.

\* Author for correspondence (oxburl@mmc.org)

compartment. We find that a specific group of FGF and EGF ligands supports CITED1<sup>+</sup> progenitor maintenance by means of the intracellular signaling mediator RAS (HRAS1 – Mouse Genome Informatics). We test this hypothesis *in vivo* by driving overexpression of sprouty 1 (*Spry1*), an inhibitor of the receptor tyrosine kinases (RTKs) that activate RAS, specifically in the CITED1<sup>+</sup> progenitor compartment. We find that progenitor cell survival is impaired and that there is a reduced contribution of *Spry1*-expressing progenitors to the development of epithelial structures.

## MATERIALS AND METHODS

### Cell culture

Nephrogenic zone cells (NZCs) were extracted from E17.5 mouse kidneys and cultured as previously described (Blank et al., 2009). Growth factors used are listed in Table 1. The FGF inhibitor PD173074 (50 nM, Sigma), RAS inhibitor FPT III (25  $\mu$ M, EMD Biosciences), PI3K inhibitor LY294002 (50  $\mu$ M, Cell Signaling Technology) and ERK activation inhibitor peptide I (2.5  $\mu$ M, EMD Biosciences) and Wnt inhibitor IWR1 (10  $\mu$ M, Tocris Bioscience) were used at concentrations verified by the respective vendors to be specific for the kinases under study, with limited off-target effects.

### Immunofluorescence, X-gal staining and microscopy

Monolayer cells were fixed and stained as previously described (Blank et al., 2009). Antibodies used were: CITED1, 1:100 (NeoMarkers); SIX2, 1:50 (Santa Cruz Biotechnology); LEF1, 1:50 (Cell Signaling Technology); PAX2, 1:100 (Invitrogen); pHH3, 1:100 (Cell Signaling Technology); GFP, 1:100 (Abcam); and WT1, 1:100 (Santa Cruz Biotechnology). Paraffin sections were immunostained as previously described (Blank et al., 2009). Immunofluorescence was quantified by measuring the integrated density using ImageJ. Values were normalized to the number of DAPI-stained nuclei in each field. X-gal staining was performed as described (Dudley et al., 1995).

### Quantitative (q) PCR

RNA was extracted from NZCs plated in monolayer derived from pools of E17.5 mouse embryonic kidneys using the RNeasy Micro Kit (Qiagen). cDNA synthesis was performed using qScript cDNA SuperMix (Quanta Biosciences). qPCR was carried out using iQ SYBR Green Supermix (Bio-Rad). Each assay was performed in triplicate and fold changes were calculated using the  $\Delta\Delta C_T$  method, normalized to endogenous *Actb* levels and displayed relative to the controls. Specificities of primer sets were determined by melt curve analysis on qPCR-generated amplicons. Average values ( $\pm$  s.d.) of three technical replicates from NZCs of 20-24 pooled embryonic kidneys are shown in the figures.

### Statistics

*P*-values for protein quantitation of immunofluorescent images and TUNEL staining were derived using a two-tailed homoscedastic Student's *t*-test. For qPCR, owing to the differing variance of data points as the cycle threshold increases, *P*-values shown were calculated using a two-tailed heteroscedastic Student's *t*-test. *P*<0.05 was considered significant. The standard deviation was calculated for technical replicates derived from NZCs of 20-24 pooled kidneys or the standard error was calculated for true biological replicates derived from independent mice.

### Adenoviral vectors and transduction

Transduction with adenovirus was carried out as previously described (Blank et al., 2009) for 24 hours with a multiplicity of infection of 500 in fibronectin-coated wells using serum-free medium.

### Mouse strains and tamoxifen injection

Animal care was in accordance with the National Research Council Guide for the Care and Use of Laboratory Animals and protocols were approved by the Institutional Animal Care and Use Committee of Maine Medical Center. NZCs were derived from kidneys of E17.5 ICR mice. *Cited1-CreER<sup>T2</sup>* mice, *R26R<sup>lacZ</sup>* mice and *Spry1*-overexpressing transgenic mice are maintained on an FVB/NJ background (Soriano, 1999; Boyle et al., 2008; Yang et al., 2008). Pregnant mice were injected at the times indicated with 6 mg tamoxifen in corn oil per 40 g mouse.

**Table 1. Growth factors used in this study**

| Growth factor                | Validated range for biological activity | Concentration used |
|------------------------------|-----------------------------------------|--------------------|
| Biglycan (BGN)               | 2-8 $\mu$ g/ml                          | 2 $\mu$ g/ml       |
| BMP4                         | 10-30 ng/ml                             | 50 ng/ml           |
| BMP7                         | 100-600 ng/ml                           | 50 ng/ml           |
| DKK1                         | 0.8-4 $\mu$ g/ml                        | 1 $\mu$ g/ml       |
| EGF                          | 0.1-0.4 ng/ml                           | 100 ng/ml          |
| FGF1                         | 0.1-200 ng/ml                           | 25-100 ng/ml       |
| FGF2                         | 0.5-2.5 ng/ml                           | 25-100 ng/ml       |
| FGF7                         | 10-50 ng/ml                             | 25-100 ng/ml       |
| FGF8b                        | 1-3 ng/ml                               | 25-100 ng/ml       |
| FGF9                         | 1-5 ng/ml                               | 25-100 ng/ml       |
| FGF10                        | 20-100 ng/ml                            | 25-100 ng/ml       |
| FGF12                        | 1.6-100 ng/ml                           | 25-100 ng/ml       |
| FGF20                        | 0.2-1 ng/ml                             | 25-100 ng/ml       |
| GDF11                        | 2-8 ng/ml                               | 100 ng/ml          |
| GDNF                         | 5-10 ng/ml                              | 50 ng/ml           |
| IL6                          | 0.2-0.8 ng/ml                           | 20 ng/ml           |
| Inhibin, beta A (INHBA)      | 0.5-2 ng/ml                             | 40 ng/ml           |
| Insulin (INS)                | 0.001-20 $\mu$ g/ml                     | 10 $\mu$ g/ml      |
| LIF                          | 5 ng/ml                                 | 20 ng/ml           |
| MDK                          | 0.1-10 ng/ml                            | 7 nM (98.3 ng/ml)  |
| NOG                          | 0.006-0.3 $\mu$ g/ml                    | 1 $\mu$ g/ml       |
| PDGF-BB                      | 1.5-6 ng/ml                             | 100 ng/ml          |
| PLGF                         | 0.1-5 ng/ml                             | 20 ng/ml           |
| All-trans retinoic acid (RA) | –                                       | 200 nM             |
| SCF                          | 2.5-5 ng/ml                             | 500 ng/ml          |
| TGF $\alpha$                 | 0.2 ng/ml                               | 100 ng/ml          |
| TGF $\beta$ 1                | 0.04-0.2 ng/ml                          | 50 ng/ml           |
| TGF $\beta$ 2                | 0.1-0.3 ng/ml                           | 0.67 ng/ml         |
| VEGFA (165)                  | 1-6 ng/ml                               | 100ng/ml           |
| WNT4                         | 15-60 ng/ml                             | 50 ng/ml           |

RESULTS

**FGF/EGF signaling maintains an early nephron progenitor phenotype**

To identify signaling pathways that promote renewal of early nephron progenitor cells, a recently established *ex vivo* nephrogenic zone cell (NZC) culture system was used to screen a panel of factors with known expression and/or function in kidney development (Table 1) (Blank et al., 2009). Briefly, the capsules of embryonic day 17.5 (E17.5) mouse kidneys are removed and the underlying nephron progenitor cells and cortical interstitial cells are enzymatically separated from ureteric bud structures. The liberated nephron progenitor cells and cortical interstitial cells (collectively the NZCs) are then cultured in serum-free conditions on fibronectin-coated plates in the presence or absence of candidate growth factors.

A primary screen for effects on proliferation was conducted by measuring phospho-histone H3 (pHH3)-positive nuclei in cultured NZCs. Compared with untreated controls, FGF2 was the most potent proliferative factor after 24 hours, increasing proliferation by over 300%, followed by TGF $\alpha$ , BMP7 and EGF (Fig. 1A). Morphologically, cultures treated with FGF2 showed increased spreading, cellularity and attachment of NZCs to the well surface at 24 hours (Fig. 1A, inset).

Nephron progenitor cells are arranged into distinct compartments within cap mesenchyme, with expression of the transcriptional coactivator CITED1 identifying the earliest nephron progenitor cells and the  $\beta$ -catenin-interacting transcription factor LEF1 marking the more differentiated pretubular aggregate cells (Fig. 1B) (McMahon et al., 2008; Mugford et al., 2009). Analysis of CITED1 protein expression in growth factor-treated NZC cultures

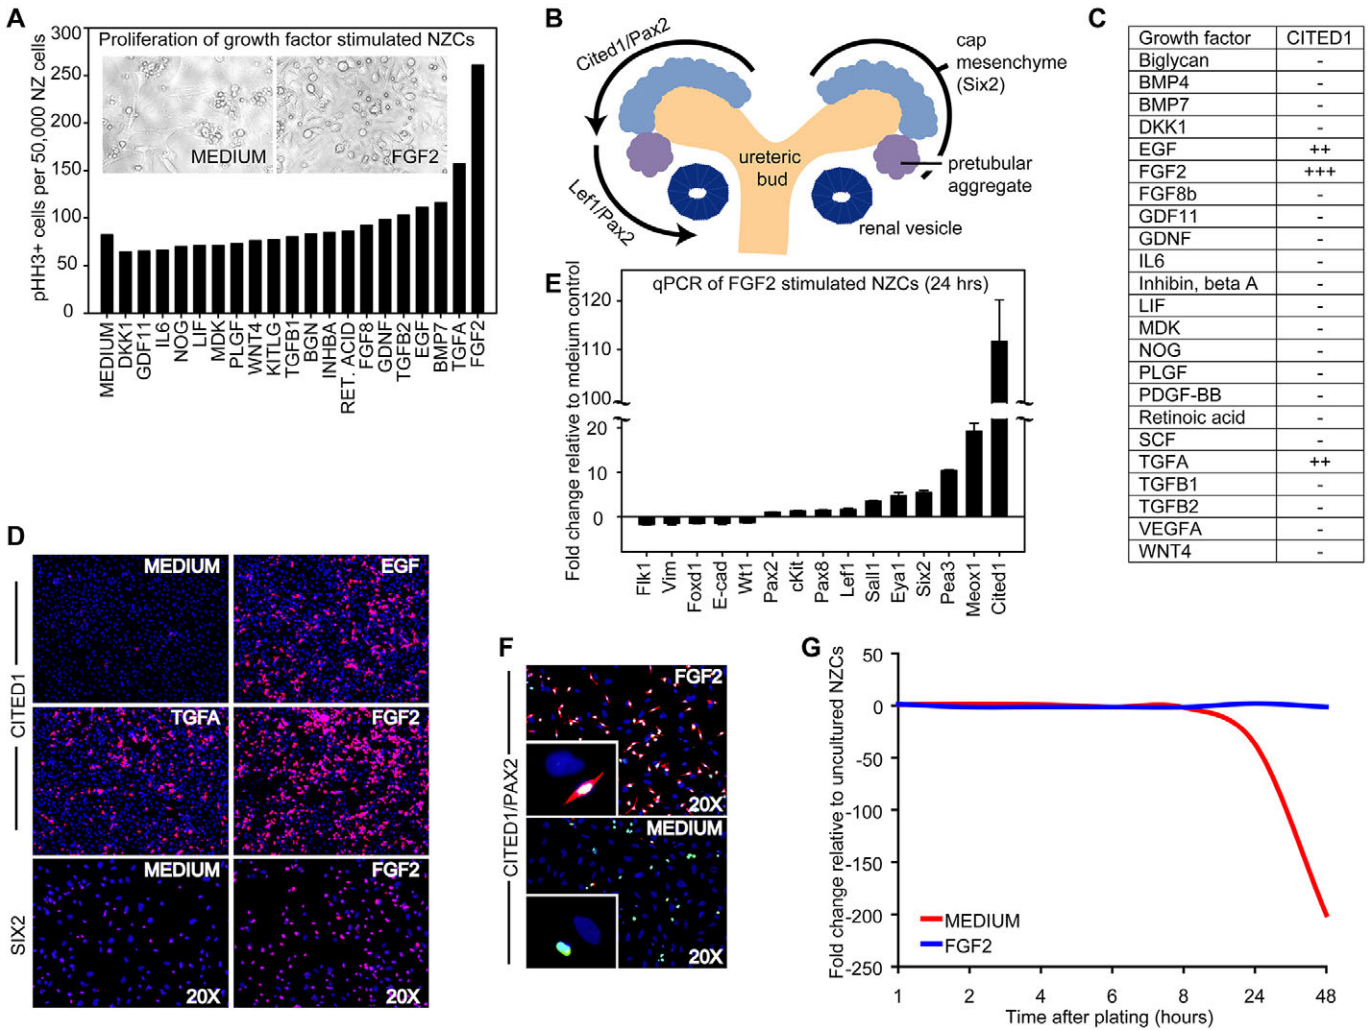

**Fig. 1. FGF/EGF signaling maintains an early nephron progenitor phenotype *in vitro*.** (A) Proliferation assay of nephrogenic zone cells (NZCs) treated with recombinant proteins or retinoic acid. Shown is the number of pHH3-positive mitotic events per 50,000 cells. Inset shows NZC morphology after 24 hours in culture medium with or without FGF2. (B) Subcompartments in the nephrogenic zone. Arrows indicate direction of increasing differentiation. (C) Summary of the ability of growth factors to promote CITED1 expression in NZCs (24 hours). (D) Immunofluorescence showing that the RTK ligands FGF2, TGF $\alpha$  and EGF promote the greatest increase in CITED1 (red, 10 $\times$  image) of all growth factors tested. FGF2 also promotes increased expression of SIX2 (red, 20 $\times$  image). (E) FGF2 treatment dramatically increases *Cited1* transcription after 24 hours. Error bars indicate s.d. (F) Increased CITED1 expression by FGF2 occurs within the PAX2<sup>+</sup> nephron progenitor population. PAX2<sup>+</sup> progenitors (green) from *Cited1-CreER<sup>72</sup>* mice that drive a GFP reporter co-express GFP (red) when treated with FGF2, but not when cultured in medium alone. PAX2/GFP double-positive nuclei are yellow in the image overlays. Insets show representative positive and negative cells. (G) FGF2 treatment maintains *Cited1* transcription up to 48 hours after harvest.



revealed that the proliferative effects of FGF2, TGF $\alpha$  and EGF, which are known ligands of the RTK signaling family, correlated with increased numbers of these early progenitors; this was in contrast to the proliferative effects associated with the RTK-independent ligand BMP7 (Fig. 1C,D; supplementary material Fig. S1). To ensure that CITED1<sup>+</sup> cells promoted by FGF2 treatment retained the capacity to differentiate to the LEF1-expressing pretubular aggregate, we subjected FGF2-treated cultures to treatment with the canonical Wnt signaling activator BIO 18 hours after FGF2 addition. BIO-treated cultures showed a significant increase in LEF1 expression, indicating that they indeed retain the potential to differentiate (supplementary material Fig. S2).

The combination of TGF $\beta$ 2, LIF, FGF2 and TGF $\alpha$  has a strong regulatory effect on nephron progenitor cells in the rat (Plisov et al., 2001), and we therefore tested whether these factors might regulate CITED1. We find no evidence of a synergistic effect (data not shown), possibly owing to species differences in response to these factors. Other ligands from our panel known to activate RTK signaling during kidney development, including FGF8, IL6, PLGF (PGF – Mouse Genome Informatics), PDGF, VEGFA and INS (insulin, data not shown), showed no significant increase in CITED1 protein expression (supplementary material Fig. S1). Thus, in the mouse, CITED1 expression might be controlled by a specific group of RTK ligands that activate FGF/EGF receptors.

Having ascertained that FGF2, TGF $\alpha$  and EGF promote proliferation of NZCs and the expansion of a CITED1<sup>+</sup> early nephron progenitor cell population, we analyzed a more extensive panel of molecular markers characteristic of distinct compartments within the nephrogenic zone. Expression of compartment-specific signature genes in FGF2-treated cultures was assayed, as this growth factor showed the greatest effect of the three on CITED1 protein expression (Fig. 1C,D). As anticipated, *Cited1* showed the greatest increase in expression versus the medium control at 24 hours, indicating expansion or maintenance of the earliest progenitor compartment (Fig. 1E). *Meox1*, which marks a newly identified subpopulation within the *Cited1* compartment, was highly elevated, as were the more generalized cap mesenchyme markers *Six2*, *Eya1*, *Sall1* and *Pea3* (*Etv4* – Mouse Genome Informatics), which are also known to be expressed within the CITED1<sup>+</sup> progenitor compartment in vivo (Mugford et al., 2009). Based on analysis of this functionally essential gene set, we conclude that FGF signaling promotes the early nephron progenitor cell state in NZC cultures.

Immunofluorescent staining clearly showed that increased CITED1 and SIX2 protein expression correlated with the transcriptional activation caused by FGF2 (Fig. 1D,E). Previous results from our laboratory have revealed that although the NZC culture is composed of greater than 50% PAX2<sup>+</sup> nephron progenitors derived from the cap mesenchyme, nearly 40% of the cells in these cultures represent cortical interstitium. To verify that CITED1 expression is increased in PAX2<sup>+</sup> nephron progenitors, but not in cortical interstitial cells, following FGF2 treatment, NZCs derived from the *Cited1-CreER*<sup>T2</sup> transgenic strain, which expresses GFP under the control of *Cited1*, were fixed and co-stained with anti-PAX2 (green) and anti-GFP (red) antibodies. FGF2 treatment resulted in robust GFP expression only in cells that express PAX2, whereas the majority of PAX2<sup>+</sup> progenitors lack GFP expression when cultured in medium alone. CITED1 expression in response to FGF2 thus occurs in nephron progenitor cells derived from the cap mesenchyme rather than the cortical interstitium (Fig. 1F).

To understand whether FGF2 treatment increases the abundance of early nephron progenitor cells in NZC cultures, or prevents their decline from the time of harvest, we compared *Cited1* expression in FGF2-treated and control NZCs over time and normalized the results to those from freshly isolated cells. In medium alone, NZCs progressively lose *Cited1* expression over the course of 48 hours, whereas FGF2 treatment causes persistence of *Cited1* expression throughout the time course at a level similar to that seen in freshly isolated NZCs (Fig. 1G). Taken together, these results suggest that FGF acts on nephron progenitors to promote a highly proliferative state and a transcriptional profile that is consistent with the earliest progenitor compartment.

### Select FGFs that display cap mesenchyme-specific expression maintain early nephron progenitor cells

Results presented thus far suggest that FGF2 or an FGF2-like protein regulates the renewal program of the primitive CITED1<sup>+</sup> progenitor compartment within the cap mesenchyme in vivo. To identify potential FGF candidate genes we reviewed the transcriptome data provided in the GenitoUrinary Molecular Anatomy Project (GUDMAP) database (<http://www.gudmap.org>). FGF genes expressed within specific subcompartments of the nephrogenic zone include *Fgf1*, 7, 8, 9, 10, 12 and 20 (Fig. 2). Multiple candidates are strongly expressed in the cap mesenchyme and several, including *Fgf1*, 7, 9, 10 and 20, show decreasing expression associated with the cessation of nephrogenesis at postnatal day 3, coincident with the loss of primitive cap markers such as *Cited1*, *Six2*, *Meox1* and *Dpf3* (Mugford et al., 2009).

To determine which of the FGFs expressed in the nephrogenic zone maintain the early nephron progenitor compartment, NZCs were stimulated with the corresponding recombinant FGFs and maintenance of CITED1 protein expression was measured at 24 hours (Fig. 3A). Ligand concentrations well exceeded the effective dose (ED<sub>50</sub>) range as determined in proliferation assays for each individual lot of recombinant FGF (Table 1). FGF1, 9 and 20 maintained CITED1 protein expression similarly to FGF2, and induced transcription of the primitive cap markers *Cited1*, *Pea3*, *Meox1* and *Six2*, whereas FGF7, 8, 10 and 12 showed minimal or no effect (Fig. 3A,B). Interestingly, the three FGFs capable of substituting for FGF2 in promoting progenitor cell identity are strongly expressed in the cap mesenchyme (Fig. 2). FGF8, also expressed in the later cap mesenchyme and renal vesicle, showed only a modest effect on early cap marker transcription, even though the specific activity was comparable to, or greater than, that calculated for FGF1, 2, 9 and 20 (Table 1). The maintenance of early progenitors could however be achieved by treatment with extremely high concentrations of FGF8 (1600 and 3200 ng/ml; supplementary material Fig. S3A).

FGFs can be functionally grouped according to the receptors that they activate (Eswarakumar et al., 2005). Through alternate splicing, two isoforms of FGF receptors 1 and 2 (the b and c isoforms) are generated. These isoforms are predominantly expressed in either epithelial (b) or mesenchymal (c) tissues and display distinct ligand-binding specificities. FGF receptors 1c and 2c are known for their high binding affinity to FGF1, 2, 9 and 20, and we therefore examined whether these particular receptor isoforms are expressed in NZCs (Eswarakumar et al., 2005; Lavine et al., 2005; Ohmachi et al., 2003). qPCR analysis after reaction efficiency corrections for each FGF receptor isoform demonstrates that *Fgfr1c* and *Fgfr2c* are highly enriched in mesenchyme derived

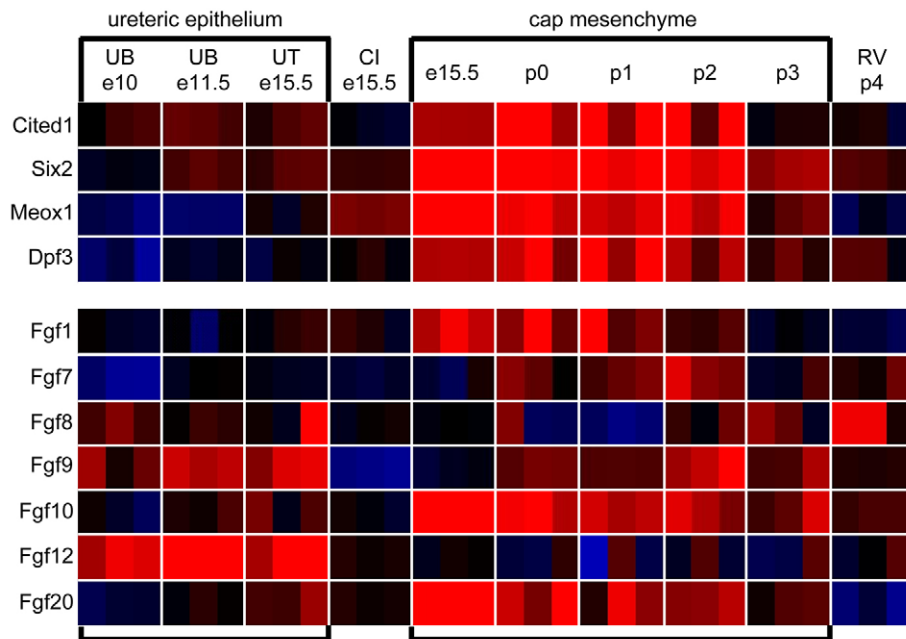

**Fig. 2. FGF candidates are redundantly expressed in distinct subcompartments of the nephrogenic zone.** Tissue expression mined from GUDMAP was used to generate the heatmap shown (reprinted with permission from the GUDMAP consortium). Baseline (black) is derived from the median value for each gene across all tissues within each platform-specific dataset. Red denotes expression above baseline, and blue expression below baseline. UB, ureteric bud; UT, ureteric tip; CI, cortical interstitium; RV, renal vesicle; e, embryonic day; p, postnatal day.

from the nephrogenic zone compared with *Fgfr1b* and *Fgfr2b* (Fig. 3C; supplementary material Fig. S3B). This suggests that CITED1<sup>+</sup> progenitors are restricted to responding to specific FGFs owing to their predominant expression of FGF receptors 1c and 2c.

Paradoxically, although *Fgf1*, 9 and 20 are expressed in the cap mesenchyme, the addition of exogenous FGF to cultures of these cells is required to maintain nephron progenitor cells. Predicting that expression of these FGFs might be lost during the culture period, we wished to determine whether reduced *Cited1* expression correlated with reduced expression of *Fgf1*, 9 and 20. Analysis of NZCs cultured in medium alone for 24 hours demonstrates that transcription of *Fgf1*, 9 and 20 decreases significantly over the culture period, as compared with expression levels in freshly isolated NZCs (Fig. 3D). Attenuated expression of these FGFs might contribute to the reduction of higher-order cap markers that is seen following culture in medium alone. Since *Fgf1*, 9 and 20 are strongly expressed in the cap mesenchyme compared with other tissues, it is possible that nephron progenitor cells contribute to the maintenance of their own renewal through FGF signaling.

### FGF/EGF maintenance of early nephron progenitors requires RAS- and PI3K-mediated signaling

The EGF receptor ligands EGF and TGF $\alpha$  maintain the nephron progenitor population in a similar manner to FGF (Fig. 4A; Fig. 1D). We therefore hypothesized that EGF receptor signaling might promote progenitor maintenance by increasing the expression of *Fgf1*, 9 and 20. Indeed, EGF receptor ligands do promote the expression of *Fgf1* and *Fgf9*, as does FGF2 treatment (Fig. 4A, inset).

To functionally test the possibility that EGF receptor ligands promote the progenitor cell state indirectly by activating FGF signaling, we treated NZCs with either EGF or TGF $\alpha$  in the presence or absence of the small molecule PD173074, a specific ATP-binding inhibitor of FGFR1, 2 and 3 (Bansal et al., 2003; Pardo et al., 2009). As expected, treatment of NZCs with PD173074 abolished the CITED1 expression promoted by FGF2; however, EGF and TGF $\alpha$  were still able to maintain the CITED1

population in the presence of the FGF receptor inhibitor (Fig. 4B). Thus, endogenously produced FGFs do not appear to be responsible for the effects of EGF and TGF $\alpha$  on CITED1<sup>+</sup> progenitor maintenance, at least in vitro.

FGF and EGF receptors frequently utilize overlapping intracellular signal transduction mediators, in particular RAS (Schlessinger, 2004). To test the possibility that both EGF and FGF receptors promote the progenitor cell state through RAS, we repeated the inhibition experiment using a small-molecule RAS inhibitor. In contrast to the results with the FGF inhibitor, CITED1 expression was extremely sensitive to the RAS inhibitor FPT III at one-quarter of the established IC<sub>50</sub> dose, which significantly lowered CITED1 expression in response to FGF and EGF receptor ligands (Fig. 4B).

FGF and EGF signaling pathways can be further separated into ERK and PI3K branches. Immunofluorescent analysis in the presence of ERK and PI3K inhibitors demonstrates that CITED1 expression is controlled by the PI3K pathway (Fig. 4B). An interesting feature of this experiment is that ERK inhibition appears to have a slight stimulatory effect on CITED1 expression. Although this was not statistically significant, we wanted to determine whether ERK inhibition might promote *Cited1* expression by inhibiting *Spry1* transcription. qPCR reveals that this is not the case (supplementary material Fig. S4).

Overall, we conclude that FGFs, EGF and TGF $\alpha$  maintain CITED1<sup>+</sup> progenitors through activation of a common RAS/PI3K-dependent RTK signaling program.

### RTK-mediated RAS signaling is required to maintain the expression of primitive nephron progenitor markers in vivo

The NZC culture system propagates a mixture of cell types representative of the nephrogenic zone. To ascertain whether RTK signaling might be acting directly on nephron progenitors, rather than secondarily through other cells in the culture, we designed an in vivo experiment to specifically abrogate the response of CITED1<sup>+</sup> nephron progenitor cells to RTK signaling. Sprouty (Spry) proteins inhibit RTK-mediated RAS activation, affecting both the FGF and

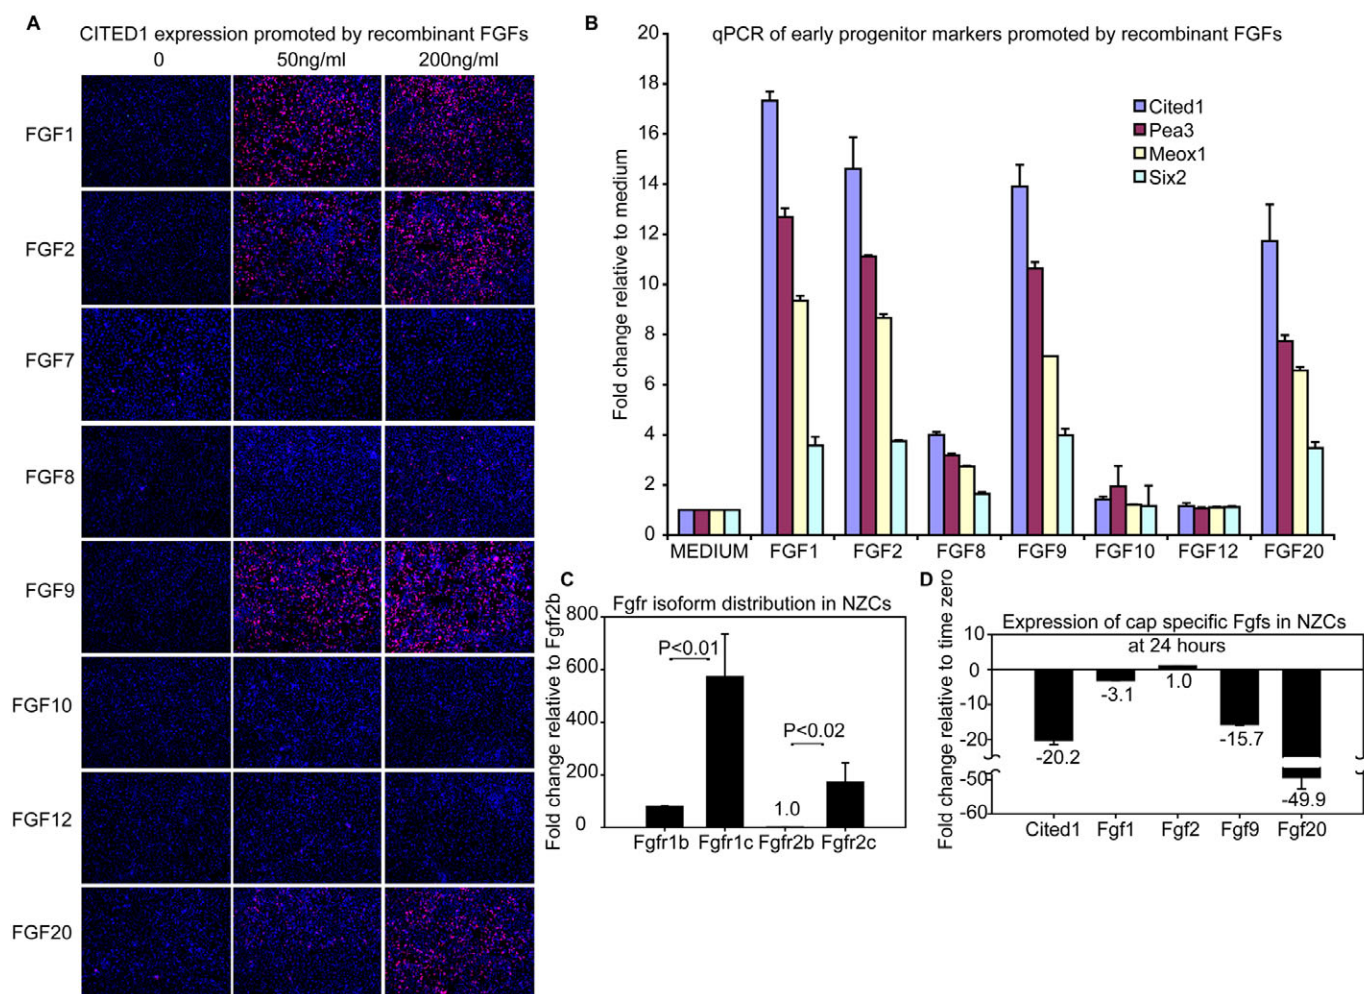

**Fig. 3. Select FGF candidates maintain early nephron progenitor cells.** (A) Immunofluorescence shows that, in addition to FGF2, the cap mesenchyme-expressed ligands FGF1, 9 and 20 promote maintenance of CITED1 (red) in NZCs cultured for 24 hours, whereas FGFs expressed in other compartments of the nephrogenic zone do not. (B) Similar to FGF2, cap mesenchyme-expressed FGFs (200 ng/ml each, 24-hour treatment) increase transcription of higher-order progenitor markers in cultured NZCs. (C) qPCR analysis of *Fgfr1* and *Fgfr2* isoforms in freshly isolated NZCs demonstrates over-representation of the c isoform compared with the b isoform for each receptor. Data were corrected for differences in primer efficiency as shown in supplementary material Fig. S3B. (D) Similar to *Cited1*, transcription of *Fgf1*, 9 and 20 decreases in cultured NZCs at 24 hours in the absence of FGF2. Error bars indicate s.d.

EGF signaling pathways (Mason et al., 2006). The *Spry1* gene is normally expressed in the collecting duct of the kidney and acts as an essential modulator of RTK signaling through the c-Ret receptor, negatively regulating ureteric bud branching (Basson et al., 2005). To develop an in vivo system with which to study the effects of FGFR/EGFR-RAS signaling in the CITED1<sup>+</sup> progenitor compartment, we used a *Spry1* Cre-inducible mouse strain, in which expression of the mouse *Spry1* cDNA is driven by a ubiquitous CMV enhancer and  $\beta$ -actin promoter (Yang et al., 2008).

We first tested the ability of *Spry1* overexpression to block CITED1 expression in NZCs derived from embryos of *Spry1* transgenic (*Spry1-Tg*) mice. Transduction of NZCs with Cre-expressing adenovirus demonstrated that a ~3-fold increase in *Spry1* transcription results in a significant reduction in CITED1 protein expression, as compared with controls treated with adenovirus containing a GFP cassette (Fig. 5A). To obtain the necessary spatial and temporal specificity of *Spry1* expression in vivo, we bred the *Spry1-Tg* transgene onto the *Cited1-CreER<sup>T2</sup>*

transgenic strain that expresses the Cre:estrogen receptor fusion protein (CreER<sup>T2</sup>) under the control of *Cited1* regulatory elements (Fig. 5B) (Boyle et al., 2008). Previous studies have demonstrated that recombination can be induced specifically in nephron progenitors of *Cited1-CreER<sup>T2</sup>* transgenic mice by tamoxifen treatment of the dam at a variety of stages throughout kidney development. To gain insight into the degree of recombination expected following a 24-hour tamoxifen induction, *Cited1-CreER<sup>T2</sup>* transgenics were bred to *R26R<sup>lacZ</sup>* mice, which constitutively express  $\beta$ -galactosidase ( $\beta$ -gal) under the control of the *Rosa26* promoter after Cre excision of loxP-flanked stop sequences (Soriano, 1999). Pregnant dams were injected with tamoxifen intraperitoneally at E16.5 and embryonic kidneys were harvested after 24 hours from *R26R<sup>lacZ</sup>* mice that were either positive or negative for the *Cited1-CreER<sup>T2</sup>* driver. As shown by X-gal staining of frozen kidney sections from *Cited1-CreER<sup>T2</sup>;R26R<sup>lacZ</sup>* transgenics, some variability is seen within the same kidney, with recombination varying from 50% to 90% of cells in individual cap



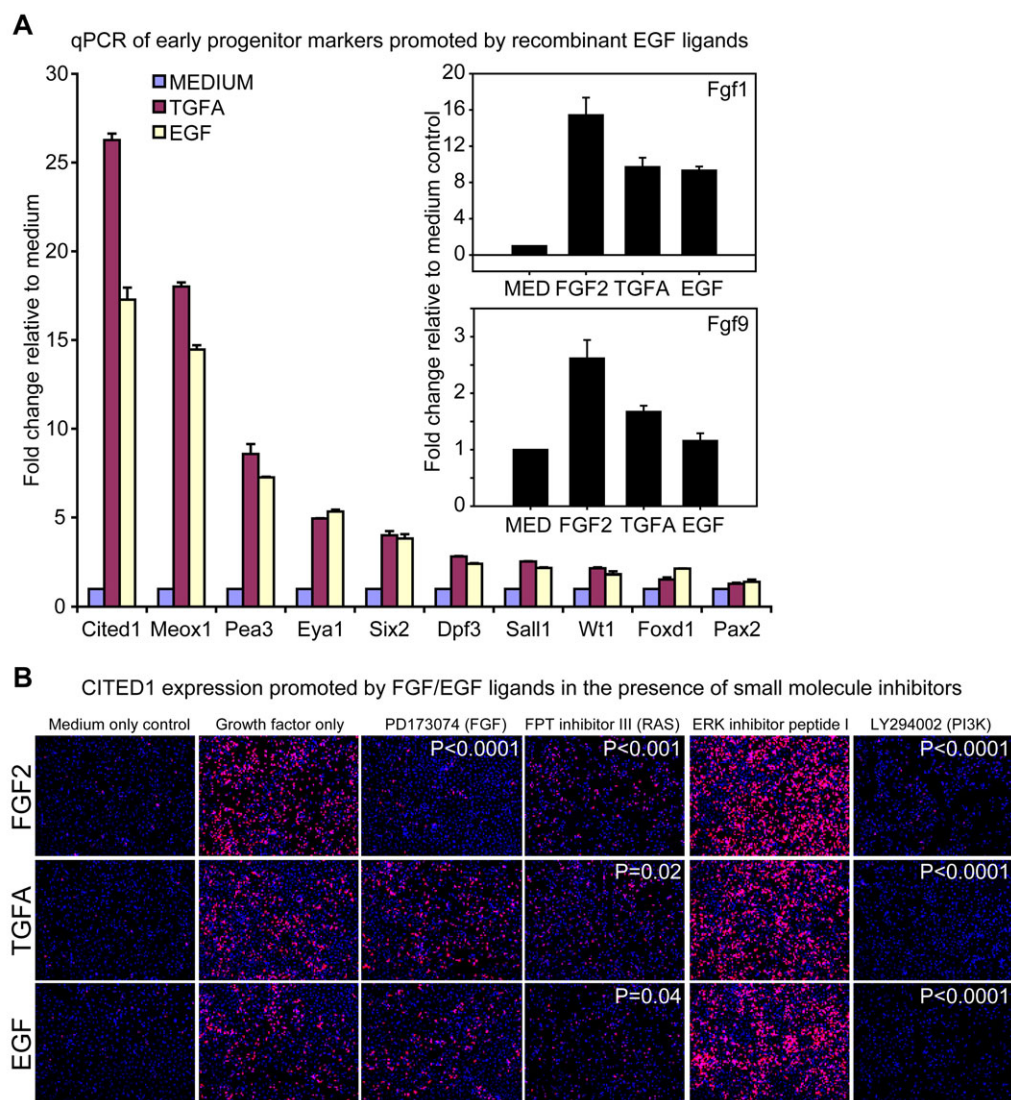

**Fig. 4. FGF/EGF signaling maintains early nephron progenitors through RAS-mediated signaling.** (A) EGF and TGF $\alpha$  promote a transcriptional profile of higher-order nephron progenitor markers, similar to that of FGF2 (see Fig. 1E), including increased expression of *Fgf1* and *Fgf9* (insets). Error bars indicate s.d. (B) The FGF receptor inhibitor PD173074 blocks CITED1 maintenance promoted by FGF2, but not that promoted by EGF or TGF $\alpha$ . The RAS (FPT III) and PI3K (LY294002) inhibitors block CITED1 protein expression promoted by all three ligands, demonstrating a common RAS/PI3K dependency.

mesenchymes (Fig. 5C; supplementary material Fig. S5). Because  $\beta$ -gal expression is heritable, cells contributing to nascent nephron structures, such as renal vesicles, can be detected. Within the 24-hour period following the tamoxifen pulse, many progenitors of the CITED1<sup>+</sup> compartment had progressed to the induced mesenchymal compartment, whereas a more limited number were found in renal vesicles.

From our primary cell analyses, we predicted that FGFR/EGFR signaling through RAS would be necessary to maintain the progenitor cell state within the cap mesenchyme, and we therefore compared the expression of WT1, PAX2, SIX2 and CITED1 by immunostaining in wild-type (*Spry1-Tg*) and mutant (*Cited1-CreER<sup>T2</sup>;Spry1-Tg*) kidneys at E17.5. The expression of the general cap mesenchyme markers WT1 and PAX2 is very similar in wild-type and mutant kidneys, and, together with Hematoxylin and Eosin staining, demonstrates that cap mesenchyme is still present in the mutant (Fig. 6A,B; supplementary material Figs S6, S7).

However, as predicted from the in vitro overexpression of *Spry1* in NZCs (Fig. 5A), the majority of CITED1 protein expression is lost from the nephrogenic zone of mutant kidneys as compared with the wild type (Fig. 6A-C; supplementary material Fig. S8). Also, a marked decrease in SIX2 protein expression was observed (Fig. 6B,C; supplementary material Fig. S8). Transcriptional analysis of freshly isolated NZCs from mutant and wild-type kidneys verified decreases in early nephron progenitor markers including *Cited1*, *Meox1*, *Pea3* and *Six2*, whereas markers of the cortical interstitium (*Foxd1*, *Sfrp1*) remained largely unchanged (Fig. 6D). Considering that CITED1<sup>+</sup> progenitors represent only 50% of the mixed NZC isolate, a 1.5-fold increase in *Spry1* expression may translate to a 3-fold increase specifically within the CITED1<sup>+</sup> compartment, as was observed in *Spry1-Tg* NZCs infected with Cre<sup>+</sup> adenovirus (Fig. 6D; Fig. 5A). From this analysis we conclude that progenitors in the CITED1<sup>+</sup> compartment require RTK-mediated RAS signaling to maintain their cellular identity in vivo.

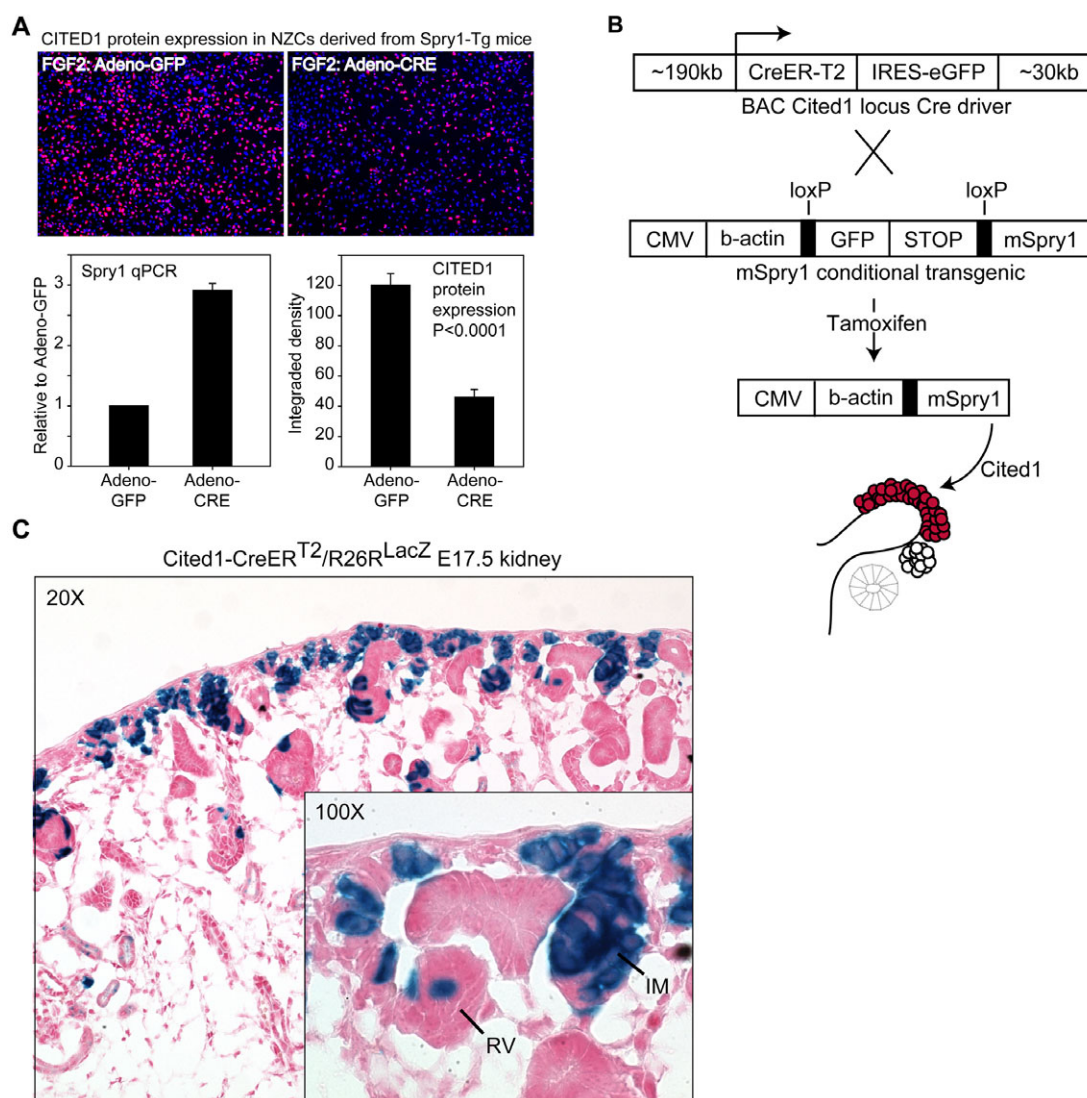

**Fig. 5. Strategy to overexpress the RTK inhibitor *Spry1* in the CITED1 progenitor compartment.** (A) FGF2-treated NZCs (24 hours) derived from tamoxifen-inducible *Spry1*-Tg mice overexpress *Spry1* and block CITED1 protein expression when infected with Cre-expressing adenovirus, as compared with GFP-expressing adenovirus controls. Representative images are shown. Error bars indicate s.d. (B) Strategy to overexpress *Spry1* in the CITED1<sup>+</sup> compartment (red cells in diagram) in vivo. (C) X-gal staining of E17.5 *Cited1*-CreER<sup>T2</sup>/R26R<sup>LacZ</sup> kidneys demonstrates recombination in the cap mesenchyme 24 hours after a single tamoxifen injection of the pregnant dam. An X-gal staining negative control is shown in supplementary material Fig. S5. IM, induced mesenchyme; RV, renal vesicle.

To ascertain whether RTK signaling through RAS is required for nephron progenitor maintenance at developmental stages earlier than E16.5, we repeated our transgenic experiment with tamoxifen injection at E12.5 and harvest at E13.5. Although a tendency can be seen toward reduction of CITED1 and SIX2 expression in the nephrogenic zone of *Cited1*-CreER<sup>T2</sup>/*Spry1*-Tg kidneys, both markers remain expressed, indicating that the effect of SPRY1 expression on nephron progenitors is less pronounced in the early kidney (supplementary material Fig. S9).

### ***Spry1* perturbs the developmental fate of early nephron progenitors**

To determine the functional consequences of *Spry1* overexpression in CITED1<sup>+</sup> nephron progenitors, we intercrossed *Cited1*-CreER<sup>T2</sup>/R26R<sup>LacZ</sup> double heterozygotes with *Spry1*-Tg heterozygotes in order to lineage trace *Spry1*-overexpressing

CITED1<sup>+</sup> progenitors by X-gal staining. We observed a clear reduction in the number of β-gal<sup>+</sup> progenitors from *Cited1*-CreER<sup>T2</sup>/R26R<sup>LacZ</sup>/*Spry1*-Tg mice after 24 hours compared with *Cited1*-CreER<sup>T2</sup>/R26R<sup>LacZ</sup> controls lacking *Spry1* overexpression (Fig. 7A). In addition, those cells that could be found in *Spry1*-overexpressing mice were largely restricted to the cap mesenchyme and did not contribute significantly to the pretubular aggregate compartment in comparison with *Cited1*-CreER<sup>T2</sup>/R26R<sup>LacZ</sup> controls (Fig. 7A). In agreement with this finding, transgenic *Spry1* overexpression was also associated with a ~50% loss of the pretubular aggregate marker LEF1 (Fig. 7B,C; supplementary material Fig. S10). Comparison of glomerular counts in *Cited1*-CreER<sup>T2</sup>/*Spry1*-Tg kidneys versus *Cited1*-CreER<sup>T2</sup> or *Spry1*-Tg wild-type controls injected with tamoxifen at E14.5 and harvested at E17.5 revealed a 5–10% decrease in glomerular numbers in mutant versus wild-type kidneys. This trend failed to reach  $P < 0.05$ ,



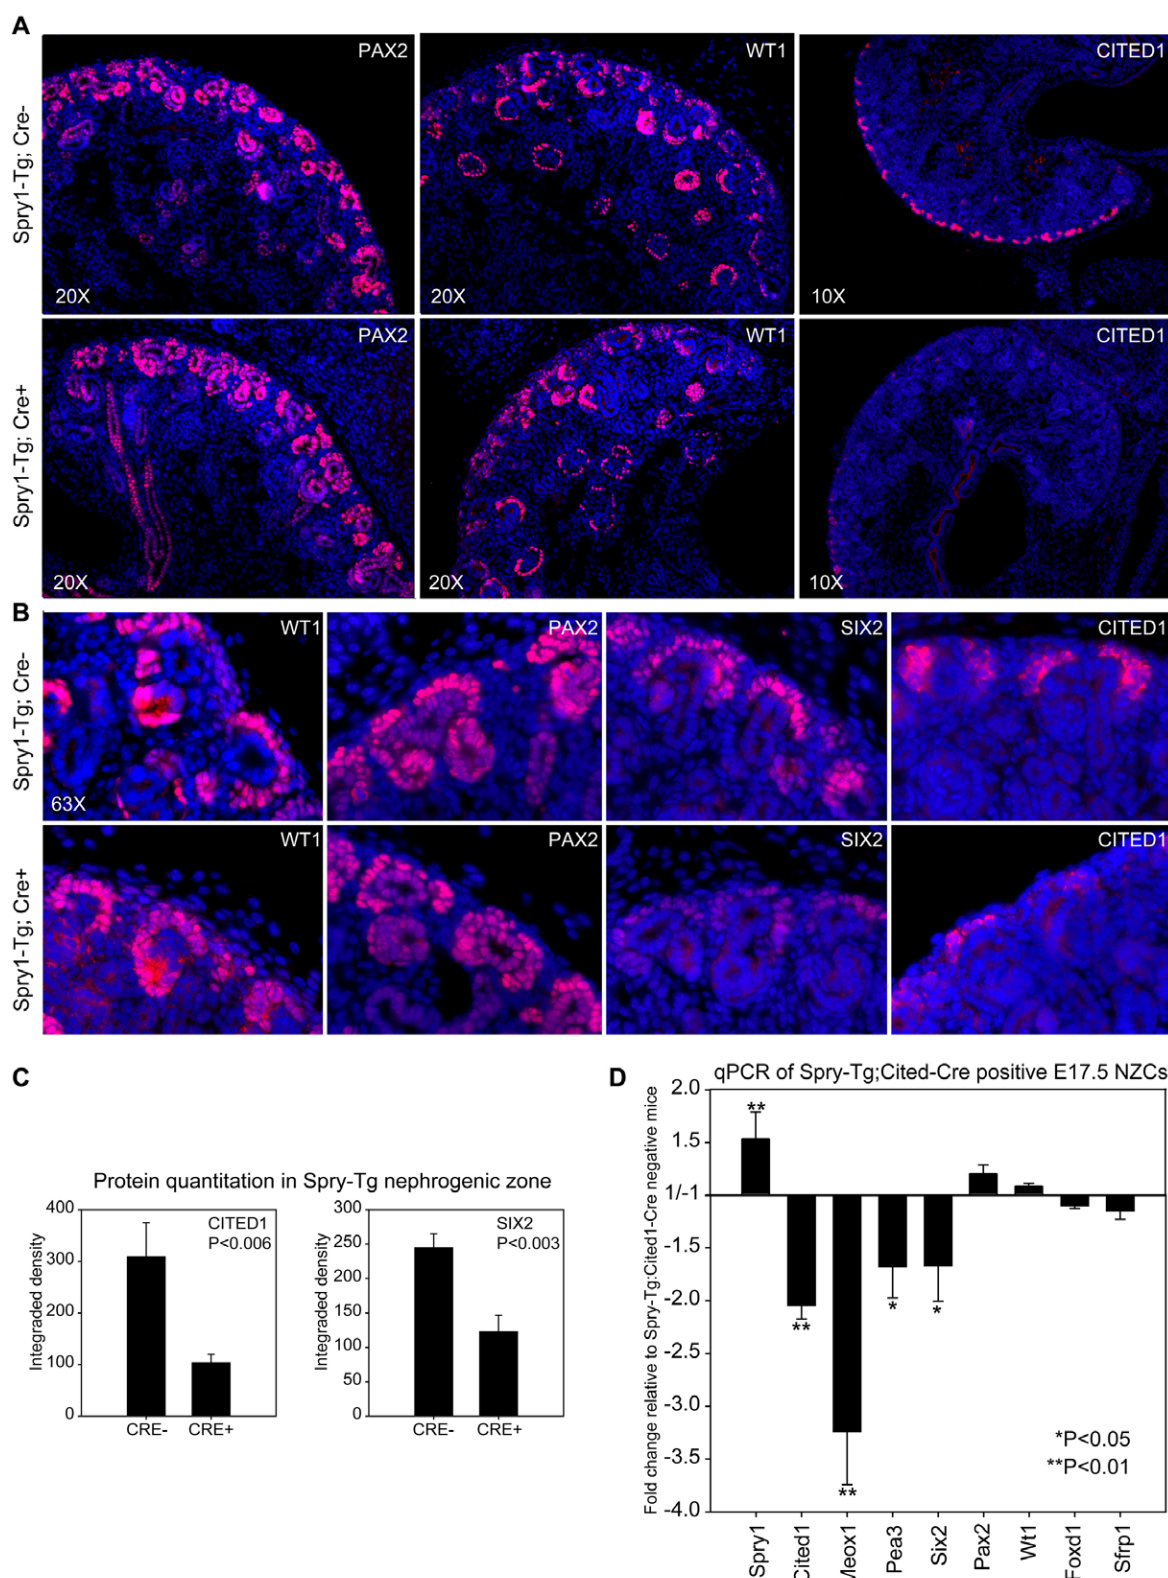

**Fig. 6. RTK-mediated RAS signaling is required to maintain the expression of primitive nephron progenitor markers in vivo.**

(A) Overexpression of mouse *Spry1* in the *Cited1* progenitor compartment reduces CITED1 protein expression, but not PAX2 or WT1 expression, in the E17.5 embryonic kidney 24 hours after tamoxifen injection. (B) Representative images of the nephrogenic zone demonstrate downregulation of CITED1 and SIX2, but not PAX2 or WT1, in *Spry1*-expressing cap mesenchyme. (C) Quantitation of CITED1 and SIX2 protein expression from kidney sections derived from *Spry1*-Tg mice with or without the *Cited1*-Cre<sup>ERT2</sup> driver. Error bars indicate s.e. (D) Transcription of early progenitor markers is decreased in NZCs derived from tamoxifen-injected *Cited1*-Cre<sup>ERT2</sup>;*Spry1*-Tg transgenic mice as compared with *Cited1*-Cre<sup>ERT2</sup> negative controls. Shown are average fold changes  $\pm$  s.e.m. derived from two independent experiments of NZCs extracted from a total of five *Cited1*-Cre<sup>ERT2</sup>-positive and 11 *Cited1*-Cre<sup>ERT2</sup>-negative embryonic kidney pairs, respectively.

and the overall effect on nephrogenesis must be considered very mild, raising the possibility that a 50% reduction in LEF1 might have only a marginal impact on the number of nephrons formed.

As we have shown in both primary cell studies and the *Spry1* transgenic model that early nephron progenitor cells lose their marker identity in the absence of FGF/EGF-mediated RAS signaling, we tested the possibility that CITED1<sup>+</sup> progenitors overexpressing *Spry1* are prematurely removed from the progenitor pool. Indeed, we observed a ~5-fold increase in TUNEL labeling in mesenchyme cells surrounding ureteric bud tips, supporting the conclusion that cells overexpressing *Spry1* are more susceptible to cell death (Fig. 7A,B). This finding was confirmed in kidneys harvested 12 hours after tamoxifen injection by immunostaining for cleaved caspase 3, an earlier marker of cell death (Fig. 8C). Because little or no morphological change other than an accumulation of pyknotic nuclei is apparent in the nephrogenic zone of mutant kidneys, we tested the hypothesis that increased proliferation of cap mesenchyme cells might compensate for the loss of cells in the mutant. Indeed, we find a ~2-fold increase in the number of cells positive for the mitosis marker pHH3 within the cap mesenchyme of mutant kidneys (Fig. 8D,E). Furthermore, analysis of  $\beta$ -gal-positive and -negative progenitors from *Cited1-CreER<sup>T2</sup>;R26R<sup>lacZ</sup>;Spry1-Tg* mice reveals that those progenitors that have not undergone recombination display a very significant proliferative advantage over those that have recombined (Fig. 8F,G). Although we do find significant increases in both cell death and proliferation within the cap progenitor compartment of *Cited1-CreER<sup>T2</sup>;Spry1-Tg* kidneys, these effects might not entirely explain the profound dilution of transgenic cap mesenchyme cells shown in the lineage-tracing experiments. Rather, we hypothesize that transgenic cap cells are diluted out due to a combined effect of cell cycle slowing/exit, cell death and compensatory expansion of wild-type progenitors.

*Fgf1* and *Fgf9* are expressed by the cap mesenchyme and maintain primitive nephron progenitor marker expression in vitro (Fig. 2; Fig. 3A,B). Furthermore, we demonstrated in vitro that transcription of

*Fgf1* and *Fgf9* was induced by FGF/EGF ligands that promote early progenitor markers in a RAS-dependent manner (Fig. 4A). A transcriptional survey of NZCs derived from *Cited1-CreER;Spry1-Tg* transgenic mice revealed that *Fgf1* and *Fgf9* expression was decreased by ~70% and ~40%, respectively, suggesting that these ligands are indeed regulated by RTK-mediated RAS signaling in vivo (Fig. 9A). A global reduction in the expression of FGFs that normally act in an autocrine manner to maintain early progenitor markers might help to explain why remaining  $\beta$ -gal-negative progenitors in the cap of *Cited1-CreER<sup>T2</sup>;R26R<sup>lacZ</sup>;Spry1-Tg* mice display decreased levels of early progenitor markers (Fig. 7A; Fig. 6).

Recently, canonical Wnt signaling has been identified as a requirement for maintenance of the *Cited1*-expressing progenitor population of the E11.5 kidney (Kamer et al., 2011). To establish whether FGF could be maintaining the CITED1<sup>+</sup> population by modulating Wnt signaling, we treated our NZC cultures with the canonical Wnt activator BIO. Wnt activation does not affect the capacity of FGF to maintain CITED1<sup>+</sup> progenitors (Fig. 9B; supplementary material Fig. S2). However, a subset of the genes that have been identified as Wnt targets in the early kidney are activated by FGF in the presence or absence of the Wnt inhibitor IWR1, showing that FGF activates these targets in a Wnt-independent manner (Fig. 9C). Furthermore, the expression of these genes is reduced in NZCs from *CreER<sup>T2</sup>;R26R<sup>lacZ</sup>;Spry1-Tg* kidneys (Fig. 9D). These data suggest that the maintenance of nephron progenitors might have a differential requirement for Wnt and FGF signaling during early (E11.5) versus later (E17.5) nephrogenesis.

## DISCUSSION

High-resolution gene expression studies have revealed that nephron progenitor cells are located in a series of compartments within the nephrogenic zone (Mugford et al., 2009). The signals that regulate the distribution of nephron progenitor cells in distinct compartments are poorly understood, and their elucidation will provide essential insights into normal nephrogenesis and

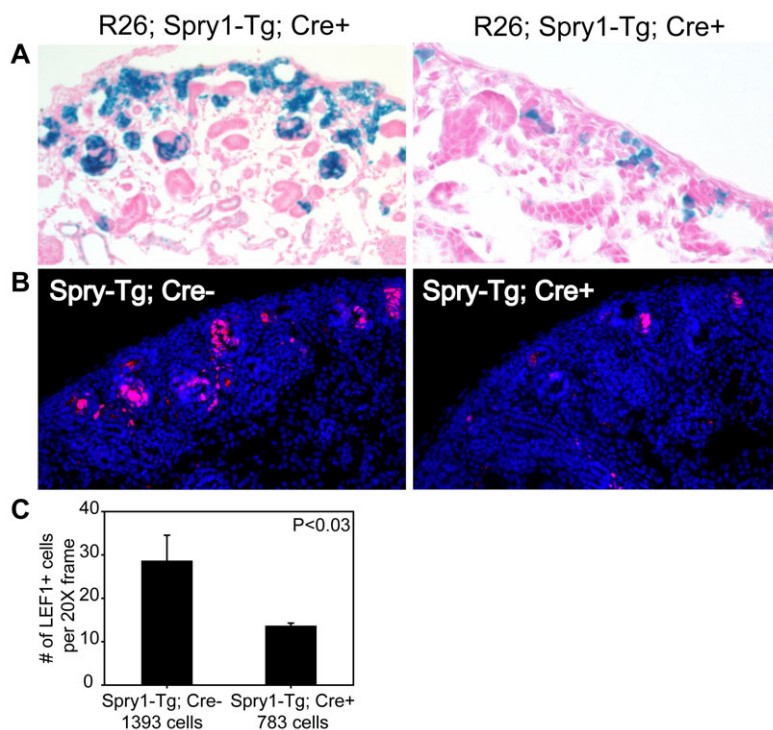

**Fig. 7. The fate of nephron progenitors is disrupted in *Spry1*-overexpressing mice.** (A) Representative X-gal staining from *Cited1-CreER<sup>T2</sup>;R26R<sup>lacZ</sup>;Spry1-Tg* E17.5 frozen kidney sections 24 hours after tamoxifen treatment demonstrates a loss of  $\beta$ -gal<sup>+</sup> progenitors and a reduced contribution to more differentiated nephron structures compared with *Cited1-CreER<sup>T2</sup>;R26R<sup>lacZ</sup>* controls. (B) Representative immunofluorescent images from E17.5 kidney sections of *Cited1-CreER<sup>T2</sup>;Spry1-Tg* mice demonstrate a loss of the induced mesenchymal and renal vesicle marker LEF1 as compared with control *Spry1-Tg* mice. (C) Quantitation of LEF1 expression from the full panel of immunofluorescence images shown in supplementary material Fig. S10. Error bars represent the s.e.m. from four mice analyzed in each group.



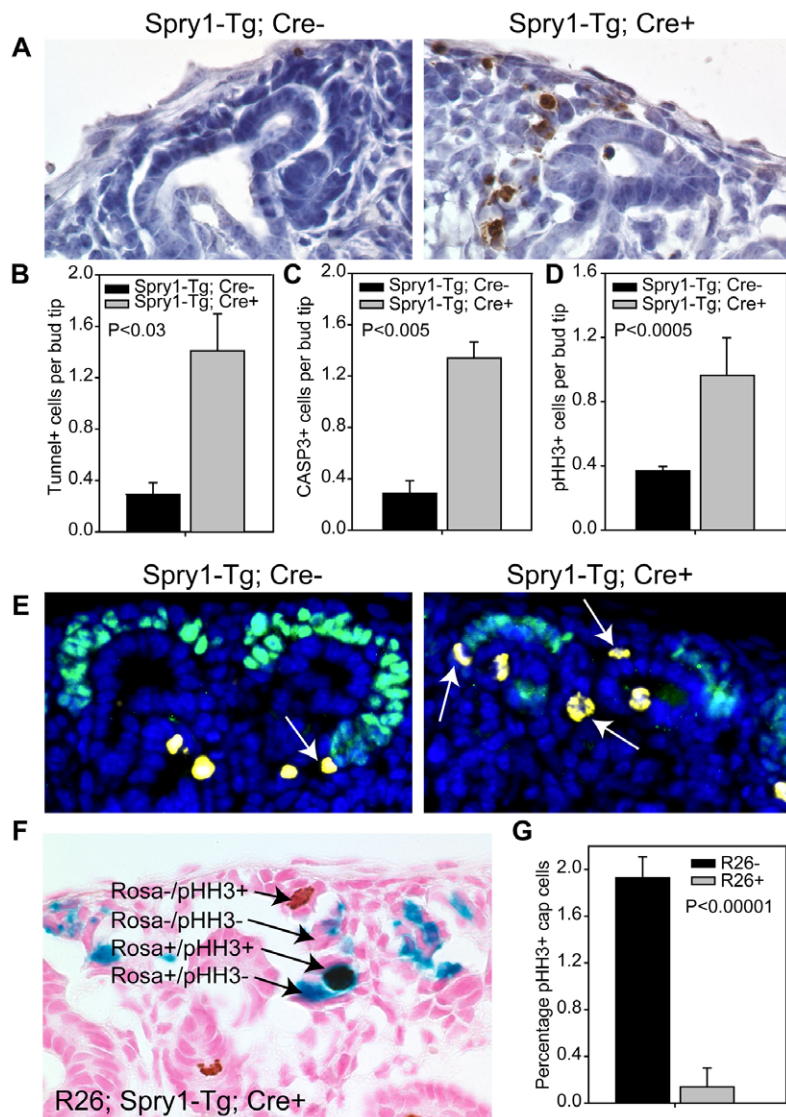

**Fig. 8. Transgenic *Spry1* expression increases apoptosis and proliferation in the cap mesenchyme.** (A) Representative images of TUNEL-stained E17.5 *Cited1-CreER<sup>T2</sup>;Spry1-Tg* kidneys show increased apoptosis in the nephrogenic zone, as compared with *Spry1-Tg* controls. Kidneys were harvested 24 hours after tamoxifen injection. (B) Quantification of TUNEL shows a ~5-fold increase in apoptosis in the cap mesenchyme per bud tip ( $n=448$ ) compared with the control ( $n=361$ ). Four kidney sections were counted and averaged from each of three mice per group. (C,D) *Cited1-CreER<sup>T2</sup>;Spry1-Tg* mice display increased levels of (C) the early apoptosis marker cleaved caspase 3 (CASP3) and (D) the mitosis marker pHH3 in the cap mesenchyme 12 hours after tamoxifen injection. One hundred and eighty-five cap mesenchymes were counted and averaged from each of four mice per group. (E) Representative images co-stained for pHH3 (yellow) and SIX2 (green). Arrows indicate the pHH3<sup>+</sup> cells counted in the mesenchyme, but not the ureteric bud. (F) Frozen tissue section showing cap mesenchyme cells stained for R26R expression by X-gal staining (blue) and for pHH3 by DAB staining (brown) in *Cited1-CreER<sup>T2</sup>;R26R<sup>lacZ</sup>;Spry1-Tg* mice. Double-negative cells are red, whereas R26R/pHH3 double-positive cells show intense dark-blue staining. (G) Quantitation of kidney sections (as shown in F) demonstrates a much higher percentage of wild-type progenitors undergoing mitosis compared with  $\beta$ -gal<sup>+</sup> progenitors that have undergone recombination. Error bars indicate s.d. per kidney section.

developmental kidney malformations. The earliest compartment, which expresses CITED1, is predicted to possess the greatest capacity for self-renewal and differentiation (Boyle et al., 2008). Although CITED1 is an important molecular marker for the earliest nephron progenitor cell compartment, the transcription factor itself is not essential for kidney development (Boyle et al., 2007). However, redundancy with CITED2 remains a possibility, and the early lethality of the *Cited2* null mouse has precluded this analysis at the later developmental time points that we focused on in our study. We found that RTK activation by FGF and EGF receptor ligands maintains the early CITED1<sup>+</sup> nephron progenitor phenotype in a RAS-dependent manner. A number of FGF and EGF receptor ligands are expressed within the nephrogenic zone, suggesting extensive redundancy in vivo. Blockade of RTK signaling by transgenic *Spry1* overexpression resulted in the loss of early progenitor cell markers and in increased apoptosis in the cap mesenchyme. Moreover, lineage tracing demonstrated that remaining labeled progenitors overexpressing *Spry1* were unable to contribute to the pretubular aggregate and renal vesicle compartments. We conclude that redundant FGF/EGF-mediated RAS signaling regulates the maintenance and developmental potential of the early nephron progenitor cell population.

Several reports suggest that EGF receptor ligands might regulate the survival of nephron progenitor cells. Neutralizing antibody treatments of kidney organ culture show that TGF $\alpha$  is required for kidney development in vitro (Rogers et al., 1992). Furthermore, in combination with FGF2 or conditioned medium from ureteric bud cells, TGF $\alpha$  promotes the survival of isolated E13 rat metanephric mesenchyme, indicating that it has a survival-promoting effect on early nephron progenitor cells (Barasch, 1999; Karavanova et al., 1996). However, unlike FGF2, TGF $\alpha$  treatment is not sufficient to rescue isolated metanephric mesenchyme from death in culture, indicating that its role is limited to augmenting survival (Karavanova et al., 1996). The EGFR ligand amphiregulin is under the transcriptional control of the transcription factor WT1, which is expressed in nephron progenitor cells. Amphiregulin protein is abundant in the nephrogenic zone, and it promotes the growth of cultured kidneys suggesting that it might act as a proliferative factor for nephron progenitor cells (Lee et al., 1999). One caveat to the interpretation of organ culture treatment experiments is the fact that many studies have been conducted using rat kidneys, which respond differently to growth factor treatment than mouse kidneys. Compound genetic inactivation of EGF, TGF $\alpha$  and amphiregulin in the mouse does not perturb kidney development,



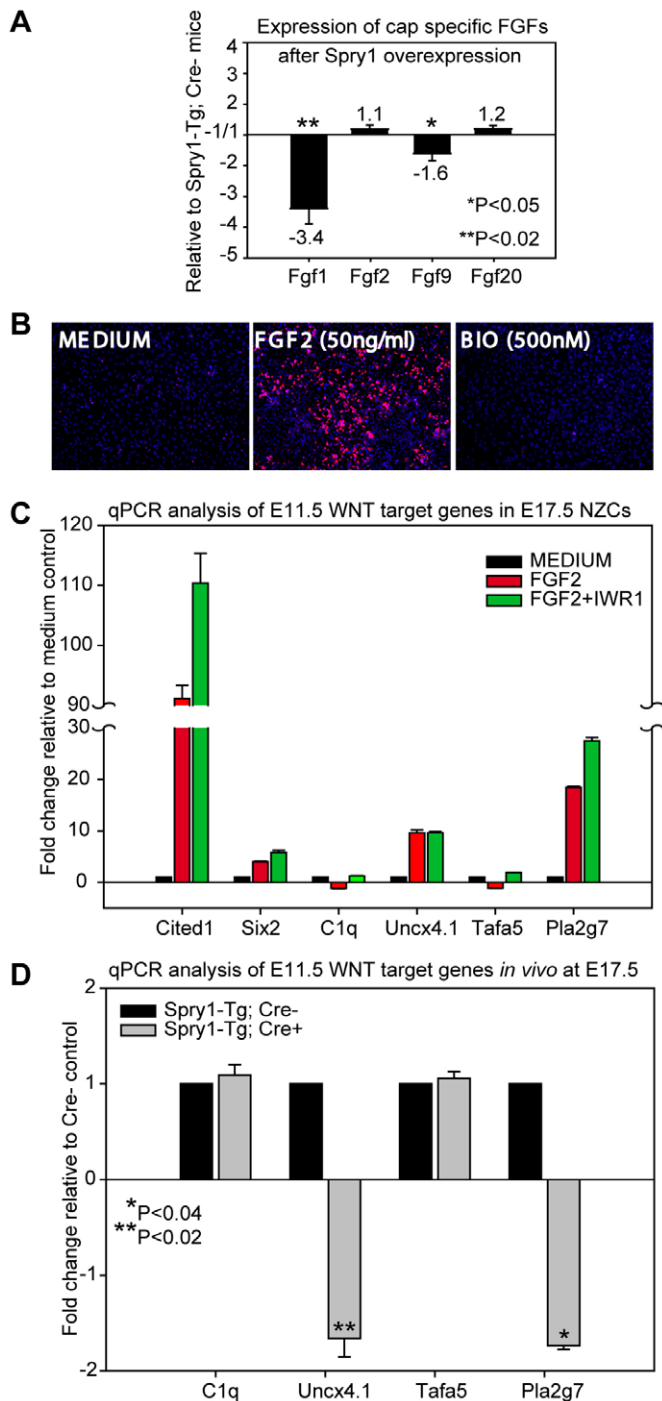

**Fig. 9. Antagonism of RTK signaling in the CITED1<sup>+</sup> compartment alters FGF ligand and Wnt target gene expression in the nephrogenic zone.** (A) NZCs derived from *Cited1*-CreER<sup>T2</sup>; *Spry1*-Tg mice show decreased expression of *Fgf1* and *Fgf9* compared with control mice, as assessed by qPCR. (B) BIO does not increase the expression of CITED1 in NZC cultures. (C) NZC cultures treated with FGF2 display increased transcription of several genes (including *Uncx4.1* and *Pla2g7*) that have recently been shown to be direct targets of Wnt signaling in the E11.5 kidney; this is not reversed by the Wnt inhibitor IWR1 (10  $\mu$ M). (D) Freshly isolated NZCs derived from *Cited1*-CreER<sup>T2</sup>; *Spry1*-Tg mice show decreased expression of *Uncx4.1* and *Pla2g7*. The numbers of mice and statistical analyses performed are as described in Fig. 6D. Error bars in A and D indicate s.e. as shown in Fig. 6D.

demonstrating that they are not required for the maintenance of nephron progenitors *in vivo* (Luetteke et al., 1999), perhaps owing to their functional redundancy with FGFs.

Genetic and organ culture experiments indicate roles for FGF signaling in nephron progenitor cell maintenance. FGF2 supports proliferation and inhibits apoptosis of isolated metanephric mesenchymes (Barasch et al., 1997; Dudley et al., 1999; Perantoni et al., 1995), promoting expression of the anti-apoptosis gene *Wt1* (Perantoni et al., 1995). Similar to the findings of our study, this effect cannot be reproduced with FGF7 but can be reproduced with FGF1 (Barasch et al., 1997). Compound conditional inactivation of FGF receptors 1 and 2 in the mesenchyme of the developing kidney results in arrest of nephrogenesis at ~E11.5, demonstrating an essential role for FGF signaling in the development of the metanephric mesenchyme (Poladia et al., 2006). Several FGF ligands are expressed within the developing kidney, and genetic inactivation studies have revealed phenotypes for *Fgf7*, *Fgf8* and *Fgf10* mutants. Inactivation of *Fgf7* and *Fgf10*, known ligands for FGF receptor b isoforms, result in defects in collecting duct branching (Michos et al., 2010; Ohuchi et al., 2000; Qiao et al., 1999). In this study, we found evidence that early nephron progenitors residing within the cap mesenchyme express a class of FGFs (*Fgf1*, 9 and 20) that normally bind FGF receptor c isoforms and are capable of promoting renewal of early CITED1<sup>+</sup> progenitors. In accordance, our gene expression analyses indicate that NZCs display predominant expression of *Fgfr1c* and *Fgfr2c*. Recent genetic studies in mice further support this notion and demonstrate that, in the absence of *Fgfr1*, there is a specific requirement for the c isoform of *Fgfr2* in the development of the metanephric mesenchyme, including the maintenance of the *Six2* and *Pax2* progenitor compartments. Taken together, these data suggest that early nephron progenitors might rely, in part, on FGF receptor/ligand signaling that acts in an autocrine manner for their maintenance (Sims-Lucas et al., 2011).

Genetic inactivation studies have shown a requirement for *Fgf8* in the survival of CITED1<sup>+</sup> nephron progenitors within the nephrogenic zone (Grieshammer et al., 2005; Perantoni et al., 2005). However, in contrast to FGF1, 2, 9 and 20, we find that FGF8 has a very weak effect on the CITED1<sup>+</sup> progenitor phenotype. This is surprising considering that all of these FGFs are predicted to signal through the c isoforms of the FGF receptors. Although a technical explanation for this effect cannot be entirely ruled out, we have titrated independent lots of FGF8 with defined ED<sub>50</sub> values over an extensive concentration range, finding a high concordance of results. Our finding that nephron progenitor cells are insensitive to FGF8 might be explained by the fact that the decoy receptor *Fgfr1l* is expressed specifically in the cells of the cap mesenchyme (GUDMAP). In direct binding studies, FGFR1 has high affinity for FGF8, but shows little or no binding with FGF1, 9 and 20, and intermediate binding with FGF2 (Steinberg et al., 2010). Thus, FGFR1 might modulate the sensitivity of CITED1<sup>+</sup> cells to stimulation by FGFs, suppressing the response to FGF8. Although the *Fgfr1l* null mouse displays a strong developmental phenotype in the kidney, inferences regarding interactions with FGF8 cannot be made from the mutant analysis because *Fgf8* is not expressed due to the blockage of nephron differentiation (Gerber et al., 2009).

Wnt signaling is required for maintenance of the nephron progenitor cell compartment in the E11.5 kidney (Karner et al., 2011), and we therefore speculated that Wnt signaling might lie downstream of FGF/EGF in the cap mesenchyme. Our experiments using both an activator and an inhibitor of canonical Wnt signaling

demonstrate that this is not the case. However, a subset of gene targets activated by canonical Wnt signaling are also activated by FGF. This partial overlap in gene activation might indicate that FGF/EGF lies downstream of Wnt, as has previously been described in development of the forebrain (Paek et al., 2011). Alternatively, it might indicate that Wnt and FGF/EGF are two independent circuits that activate a common program required for nephron progenitor maintenance. The finding that Sprouty antagonism of RTK signaling impacts CITED1 and SIX2 progenitor maintenance more severely at E17.5 than at E12.5 supports the notion that these two pathways are required at different times during nephrogenesis.

Our results might have important implications regarding the pathophysiology of neoplasms such as in Wilms' tumor, which resemble renal progenitors in a state of arrested differentiation. Failure in FGF/EGF feedback control by genes such as Sprouty might contribute to the undifferentiated metanephric blastema found in Wilms' tumor, where the advanced stage of the disease is known to be correlated with persistent expression of early blastemal markers such as *Cited1* and *Meox1* (Williams et al., 2004; Li et al., 2005; Lovvorn et al., 2007a; Lovvorn et al., 2007b). The FGF/EGF signaling pathway components that are disrupted by *Spry1*, or genes that alter *Spry1* activity, might represent novel therapeutic targets to combat Wilms' tumor and other cancers that arise from parent stem cells that normally display a requirement for FGF signaling during self-renewal.

#### Acknowledgements

Special thanks to Barry Larman for critical reading of the manuscript, the GUDMAP consortium for use of their microarray data and for providing technical expertise and to Igor Prudovsky for kindly providing reagents.

#### Funding

This work was supported by the National Institute of Diabetes and Digestive and Kidney Diseases (NIDDK) [R01DK078161 and an American Recovery and Reinvestment Act (ARRA)-supported supplement R01DK078161 to L.O., R01DK073781 to R.F.]; a postdoctoral fellowship from the American Heart Association (to A.B.); with additional support provided by Maine Medical Center Research Institute (MMCRI) core facilities for Bioinformatics, Histopathology [both supported by P2P0RR18789], Transgenics and Gene Targeting [supported by P2P0RR15555]; and the MMCRI Animal Facility. Deposited in PMC for release after 12 months.

#### Competing interests statement

The authors declare no competing financial interests.

#### Supplementary material

Supplementary material available online at <http://dev.biologists.org/lookup/suppl/doi:10.1242/dev.065995/-DC1>

#### References

- Bansal, R., Magge, S. and Winkler, S. (2003). Specific inhibitor of FGF receptor signaling: FGF-2-mediated effects on proliferation, differentiation, and MAPK activation are inhibited by PD173074 in oligodendrocyte-lineage cells. *J. Neurosci. Res.* **74**, 486-493.
- Barasch, J. (1999). FGF-2: specific activity in kidney? *Kidney Int.* **56**, 1156-1157.
- Barasch, J., Qiao, J., McWilliams, G., Chen, D., Oliver, J. A. and Herzlinger, D. (1997). Ureteric bud cells secrete multiple factors, including bFGF, which rescue renal progenitors from apoptosis. *Am. J. Physiol.* **273**, F757-F767.
- Basson, M. A., Akbulut, S., Watson-Johnson, J., Simon, R., Carroll, T. J., Shakra, R., Gross, I., Martin, G. R., Lufkin, T., McMahon, A. P. et al. (2005). Sprouty1 is a critical regulator of GDNF/RET-mediated kidney induction. *Dev. Cell* **8**, 229-239.
- Blank, U., Brown, A., Adams, D. C., Karolak, M. J. and Oxburgh, L. (2009). BMP7 promotes proliferation of nephron progenitor cells via a JNK-dependent mechanism. *Development* **136**, 3557-3566.
- Boyle, S., Shioda, T., Perantoni, A. O. and de Caestecker, M. (2007). Cited1 and Cited2 are differentially expressed in the developing kidney but are not required for nephrogenesis. *Dev. Dyn.* **236**, 2321-2330.
- Boyle, S., Misfeldt, A., Chandler, K. J., Deal, K. K., Southard-Smith, E. M., Mortlock, D. P., Baldwin, H. S. and de Caestecker, M. (2008). Fate mapping using Cited1-CreERT2 mice demonstrates that the cap mesenchyme contains self-renewing progenitor cells and gives rise exclusively to nephronic epithelia. *Dev. Biol.* **313**, 234-245.
- Brunskill, E. W., Aronow, B. J., Georgas, K., Rumballe, B., Valerius, M. T., Aronow, J., Kaimal, V., Jegga, A. G., Grimmond, S., McMahon, A. P. et al. (2008). Atlas of gene expression in the developing kidney at microanatomic resolution. *Dev. Cell* **15**, 781-791.
- Dono, R., Texido, G., Dussel, R., Ehmke, H. and Zeller, R. (1998). Impaired cerebral cortex development and blood pressure regulation in FGF-2-deficient mice. *EMBO J.* **17**, 4213-4225.
- Dudley, A. T., Lyons, K. M. and Robertson, E. J. (1995). A requirement for bone morphogenetic protein-7 during development of the mammalian kidney and eye. *Genes Dev.* **9**, 2795-2807.
- Dudley, A. T., Godin, R. E. and Robertson, E. J. (1999). Interaction between FGF and BMP signaling pathways regulates development of metanephric mesenchyme. *Genes Dev.* **13**, 1601-1613.
- Eswarakumar, V. P., Lax, I. and Schlessinger, J. (2005). Cellular signaling by fibroblast growth factor receptors. *Cytokine Growth Factor Rev.* **16**, 139-149.
- Gerber, S. D., Steinberg, F., Beyeler, M., Villiger, P. M. and Trueb, B. (2009). The murine Fgfr1 receptor is essential for the development of the metanephric kidney. *Dev. Biol.* **335**, 106-119.
- Greco, V. and Guo, S. (2010). Compartmentalized organization: a common and required feature of stem cell niches? *Development* **137**, 1586-1594.
- Grieshammer, U., Cebrian, C., Ilagan, R., Meyers, E., Herzlinger, D. and Martin, G. R. (2005). FGF8 is required for cell survival at distinct stages of nephrogenesis and for regulation of gene expression in nascent nephrons. *Development* **132**, 3847-3857.
- Grobstein, C. (1953). Inductive epitheliomesenchymal interaction in cultured organ rudiments of the mouse. *Science* **118**, 52-55.
- Grobstein, C. and Dalton, A. J. (1957). Kidney tubule induction in mouse metanephrogenic mesenchyme without cytoplasmic contact. *J. Exp. Zool.* **135**, 57-73.
- Karavanova, I. D., Dove, L. F., Resau, J. H. and Perantoni, A. O. (1996). Conditioned medium from a rat ureteric bud cell line in combination with bFGF induces complete differentiation of isolated metanephric mesenchyme. *Development* **122**, 4159-4167.
- Karner, C. M., Das, A., Ma, Z., Self, M., Chen, C., Lum, L., Oliver, G. and Carroll, T. J. (2011). Canonical Wnt9b signaling balances progenitor cell expansion and differentiation during kidney development. *Development* **138**, 1247-1257.
- Kiefer, S. M., Robbins, L., Stumpff, K. M., Lin, C., Ma, L. and Rauchman, M. (2010). Sall1-dependent signals affect Wnt signaling and ureter tip fate to initiate kidney development. *Development* **137**, 3099-3106.
- Kobayashi, A., Valerius, M. T., Mugford, J. W., Carroll, T. J., Self, M., Oliver, G. and McMahon, A. P. (2008). Six2 defines and regulates a multipotent self-renewing nephron progenitor population throughout mammalian kidney development. *Cell Stem Cell* **3**, 169-181.
- Kreidberg, J. A., Sariola, H., Loring, J. M., Maeda, M., Pelletier, J., Housman, D. and Jaenisch, R. (1993). WT-1 is required for early kidney development. *Cell* **74**, 679-691.
- Lavine, K. J., Yu, K., White, A. C., Zhang, X., Smith, C., Partanen, J. and Ornitz, D. M. (2005). Endocardial and epicardial derived FGF signals regulate myocardial proliferation and differentiation in vivo. *Dev. Cell* **8**, 85-95.
- Lee, S. B., Huang, K., Palmer, R., Truong, V. B., Herzlinger, D., Kolquist, K. A., Wong, J., Paulding, C., Yoon, S. K., Gerald, W. et al. (1999). The Wilms tumor suppressor WT1 encodes a transcriptional activator of amphiregulin. *Cell* **98**, 663-673.
- Li, W., Kessler, P. and Williams, B. R. (2005). Transcript profiling of Wilms tumors reveals connections to kidney morphogenesis and expression patterns associated with anaplasia. *Oncogene* **24**, 457-468.
- Lovvorn, H. N., 3rd, Boyle, S., Shi, G., Shyr, Y., Wills, M. L., Perantoni, A. O. and de Caestecker, M. (2007a). Wilms' tumorigenesis is altered by misexpression of the transcriptional co-activator, CITED1. *J. Pediatr. Surg.* **42**, 474-481.
- Lovvorn, H. N., Westrup, J., Opperman, S., Boyle, S., Shi, G., Anderson, J., Perlman, E. J., Perantoni, A. O., Wills, M. and de Caestecker, M. (2007b). CITED1 expression in Wilms' tumor and embryonic kidney. *Neoplasia* **9**, 589-600.
- Luetteke, N. C., Qiu, T. H., Fenton, S. E., Troyer, K. L., Riedel, R. F., Chang, A. and Lee, D. C. (1999). Targeted inactivation of the EGF and amphiregulin genes reveals distinct roles for EGF receptor ligands in mouse mammary gland development. *Development* **126**, 2739-2750.
- Luo, G., Hofmann, C., Bronckers, A. L., Sohocki, M., Bradley, A. and Karsenty, G. (1995). BMP-7 is an inducer of nephrogenesis, and is also required for eye development and skeletal patterning. *Genes Dev.* **9**, 2808-2820.
- Mason, J. M., Morrison, D. J., Basson, M. A. and Licht, J. D. (2006). Sprouty proteins: multifaceted negative-feedback regulators of receptor tyrosine kinase signaling. *Trends Cell Biol.* **16**, 45-54.
- McMahon, A. P., Aronow, B. J., Davidson, D. R., Davies, J. A., Gaido, K. W., Grimmond, S., Lessard, J. L., Little, M. H., Potter, S. S., Wilder, E. L. et al.

- (2008). GUDMAP: the genitourinary developmental molecular anatomy project. *J. Am. Soc. Nephrol.* **19**, 667-671.
- Michos, O., Cebrian, C., Hyink, D., Grieshammer, U., Williams, L., D'Agati, V., Licht, J. D., Martin, G. R. and Costantini, F.** (2010). Kidney development in the absence of Gdnf and Spry1 requires Fgf10. *PLoS Genet.* **6**, e1000809.
- Mugford, J. W., Yu, J., Kobayashi, A. and McMahon, A. P.** (2009). High-resolution gene expression analysis of the developing mouse kidney defines novel cellular compartments within the nephron progenitor population. *Dev. Biol.* **333**, 312-323.
- Nishinakamura, R., Matsumoto, Y., Nakao, K., Nakamura, K., Sato, A., Copeland, N. G., Gilbert, D. J., Jenkins, N. A., Scully, S., Lacey, D. L. et al.** (2001). Murine homolog of SALL1 is essential for ureteric bud invasion in kidney development. *Development* **128**, 3105-3115.
- Ohmachi, S., Mikami, T., Konishi, M., Miyake, A. and Itoh, N.** (2003). Preferential neurotrophic activity of fibroblast growth factor-20 for dopaminergic neurons through fibroblast growth factor receptor-1c. *J. Neurosci. Res.* **72**, 436-443.
- Ohuchi, H., Hori, Y., Yamasaki, M., Harada, H., Sekine, K., Kato, S. and Itoh, N.** (2000). FGF10 acts as a major ligand for FGF receptor 2 IIIb in mouse multi-organ development. *Biochem. Biophys. Res. Commun.* **277**, 643-649.
- Ortega, S., Ittmann, M., Tsang, S. H., Ehrlich, M. and Basilico, C.** (1998). Neuronal defects and delayed wound healing in mice lacking fibroblast growth factor 2. *Proc. Natl. Acad. Sci. USA* **95**, 5672-5677.
- Paek, H., Hwang, J. Y., Zukin, R. S. and Hebert, J. M.** (2011). beta-catenin-dependent fgf signaling sustains cell survival in the anterior embryonic head by countering Smad4. *Dev. Cell* **20**, 689-699.
- Pardo, O. E., Latigo, J., Jeffery, R. E., Nye, E., Poulson, R., Spencer-Dene, B., Lemoine, N. R., Stamp, G. W., Aboagye, E. O. and Seckl, M. J.** (2009). The fibroblast growth factor receptor inhibitor PD173074 blocks small cell lung cancer growth in vitro and in vivo. *Cancer Res.* **69**, 8645-8651.
- Perantoni, A. O., Dove, L. F. and Karavanova, I.** (1995). Basic fibroblast growth factor can mediate the early inductive events in renal development. *Proc. Natl. Acad. Sci. USA* **92**, 4696-4700.
- Perantoni, A. O., Timofeeva, O., Naillat, F., Richman, C., Pajni-Underwood, S., Wilson, C., Vainio, S., Dove, L. F. and Lewandoski, M.** (2005). Inactivation of FGF8 in early mesoderm reveals an essential role in kidney development. *Development* **132**, 3859-3871.
- Plisov, S. Y., Yoshino, K., Dove, L. F., Higinbotham, K. G., Rubin, J. S. and Perantoni, A. O.** (2001). TGF beta 2, LIF and FGF2 cooperate to induce nephrogenesis. *Development* **128**, 1045-1057.
- Poladia, D. P., Kish, K., Kutay, B., Hains, D., Kegg, H., Zhao, H. and Bates, C. M.** (2006). Role of fibroblast growth factor receptors 1 and 2 in the metanephric mesenchyme. *Dev. Biol.* **291**, 325-339.
- Qiao, J., Uzzo, R., Obara-Ishihara, T., Degenstein, L., Fuchs, E. and Herzlinger, D.** (1999). FGF-7 modulates ureteric bud growth and nephron number in the developing kidney. *Development* **126**, 547-554.
- Rogers, S. A., Ryan, G. and Hammerman, M. R.** (1992). Metanephric transforming growth factor-alpha is required for renal organogenesis in vitro. *Am. J. Physiol.* **262**, F533-F539.
- Schlessinger, J.** (2004). Common and distinct elements in cellular signaling via EGF and FGF receptors. *Science* **306**, 1506-1507.
- Self, M., Lagutin, O. V., Bowling, B., Hendrix, J., Cai, Y., Dressler, G. R. and Oliver, G.** (2006). Six2 is required for suppression of nephrogenesis and progenitor renewal in the developing kidney. *EMBO J.* **25**, 5214-5228.
- Sims-Lucas, S., Cusack, B., Baust, J., Eswarakumar, V. P., Masatoshi, H., Takeuchi, A. and Bates, C. M.** (2011). Fgfr1 and the IIIc isoform of Fgfr2 play critical roles in the metanephric mesenchyme mediating early inductive events in kidney development. *Dev. Dyn.* **240**, 240-249.
- Soriano, P.** (1999). Generalized lacZ expression with the ROSA26 Cre reporter strain. *Nat. Genet.* **21**, 70-71.
- Steinberg, F., Zhuang, L., Beyeler, M., Kalin, R. E., Mullis, P. E., Brandli, A. W. and Trueb, B.** (2010). The FGFR1 receptor is shed from cell membranes, binds fibroblast growth factors (FGFs), and antagonizes FGF signaling in *Xenopus* embryos. *J. Biol. Chem.* **285**, 2193-2202.
- Vainio, S. and Lin, Y.** (2002). Coordinating early kidney development: lessons from gene targeting. *Nat. Rev. Genet.* **3**, 533-543.
- Williams, R. D., Hing, S. N., Greer, B. T., Whiteford, C. C., Wei, J. S., Natrajan, R., Kelsey, A., Rogers, S., Campbell, C., Pritchard-Jones, K. et al.** (2004). Prognostic classification of relapsing favorable histology Wilms tumor using cDNA microarray expression profiling and support vector machines. *Genes, Chromosomes Cancer* **41**, 65-79.
- Xu, P. X., Adams, J., Peters, H., Brown, M. C., Heaney, S. and Maas, R.** (1999). Eya1-deficient mice lack ears and kidneys and show abnormal apoptosis of organ primordia. *Nat. Genet.* **23**, 113-117.
- Yang, X., Harkins, L. K., Zubanova, O., Harrington, A., Kovalenko, D., Nadeau, R. J., Chen, P. Y., Toher, J. L., Lindner, V., Liaw, L. et al.** (2008). Overexpression of Spry1 in chondrocytes causes attenuated FGFR ubiquitination and sustained ERK activation resulting in chondrodysplasia. *Dev. Biol.* **321**, 64-76.
